# Supplementary material
Source: PubMed Central journal article supplement (PMC6494092)
Supplement: NIHMS1512380-supplement-2.pdf [file NIHMS1512380-supplement-2.pdf]

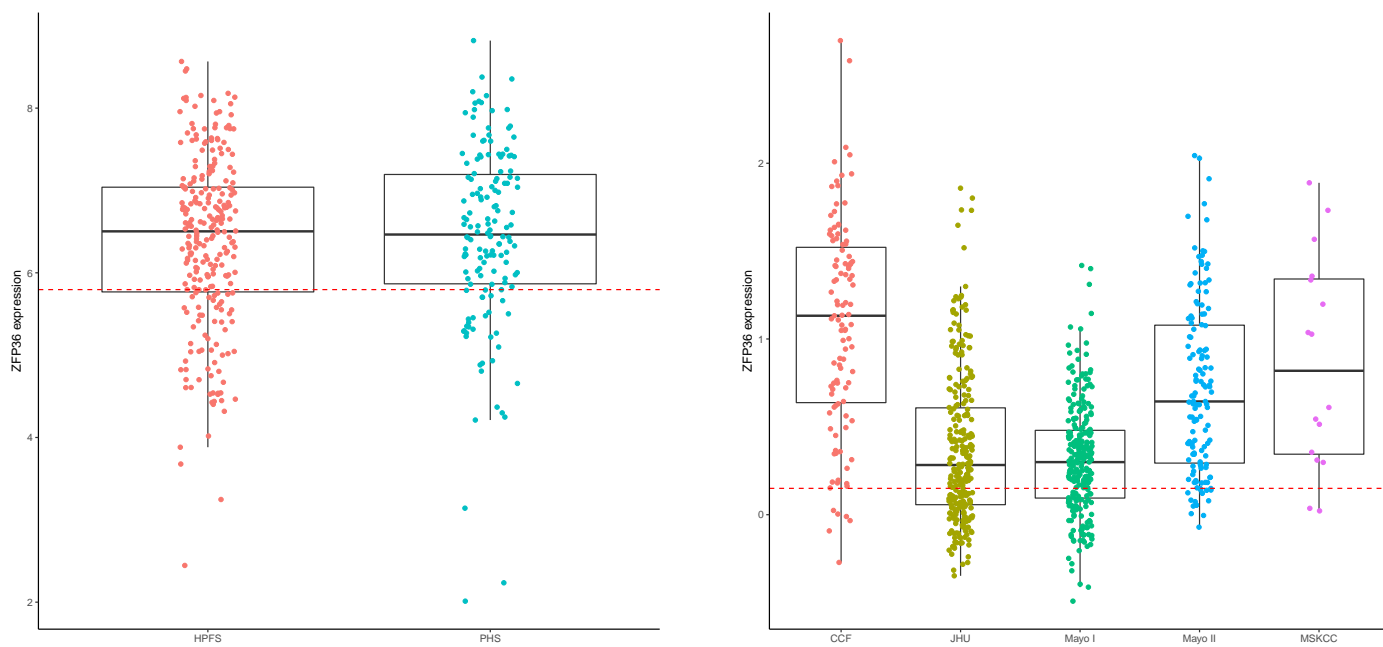

Supplementary Figure 1: Cohort-specific distributions of ZFP36. The lower quartile that was used to determine high versus low ZFP36 expression is overlaid (red dashed line) for each of the HPFS/PHS and GenomeDX cohorts.
